# Supplementary material for: Revealing the compositional effect on the intrinsic long-term stability of perovskite solar cells
Source: Royal Society of Chemistry journal article supplement (doi:10.1039/d0ta01668c), 2020-01-01
Supplement: d0ta01668c1.pdf [file d0ta01668c1.pdf]

## Supporting Information

### **Revealing the compositional effect on the intrinsic long-term stability of perovskite solar cells**

Liqiang Xie, Peiquan Song, Lina Shen, Jianxun Lu, Kaikai Liu, Kebin Lin, Wenjing Feng, Chengbo Tian, Zhanhua Wei\*

Institute of Luminescent Materials and Information Displays, College of Materials Science & Engineering, Huaqiao University, Xiamen, 361021, China.

E-mail: [weizhanhua@hqu.edu.cn](mailto:weizhanhua@hqu.edu.cn)

## **1. Experimental**

### **1.1 Materials**

Unless otherwise stated, all chemical reagents and materials were purchased from Sigma-Aldrich and used as received.

### **1.2 Devices fabrication**

Pre-patterned fluorine-doped tin oxide-coated glasses (NSG TEC A7) were firstly washed using a cleanser, and then sequentially treated by ultrasonication in deionized water, acetone, isopropanol, and ethanol for 20 min, respectively. A ~30 nm of compact TiO<sub>2</sub> blocking layer was deposited onto the UV-Ozone treated FTO by spray-pyrolysis, which was carried out at 450 °C using a precursor solution of titanium diisopropoxide bis(acetylacetonate) diluted with ethanol and a carrier gas of O<sub>2</sub>. After spraying, the samples were annealed at 450 °C for another 20 min to improve their electronic properties. To deposit the TiO<sub>2</sub> mesoporous layer, TiO<sub>2</sub> paste (Great Solar, 30 NRD) was firstly diluted in ethanol with a weight ratio of 1 : 6, then spin-coated onto the as-prepared TiO<sub>2</sub> compact layer at a speed of 5,000 rpm for 20 s with a ramp-up of 2,000 rpm s<sup>-1</sup>. The resultant films were heated at 100 °C for 10 min to remove the solvents and then sintered at 500 °C for 30 min. After cooling down to 150 °C, the substrates were immediately transferred into a N<sub>2</sub>-filled glovebox. The pristine CsFA precursor was prepared by mixing 1.1 mmol of PbI<sub>2</sub>, 1 mmol of FAI, 45 μL of CsI solution (1.5 M in DMSO) in a mixed solvent of DMF (608 μL) and DMSO (152 μL). Then the precursor solution of CsFA-Br and CsFA-Br-MA were obtained by adding 0.01 mmol of CsPbBr<sub>3</sub> and 0.01 mmol of (PbBr<sub>2</sub> + MABr) into the pristine CsFA precursor,

respectively. 40  $\mu\text{L}$  of the perovskite precursor solution was spread on the substrate and spin-coated in a two-step procedure at 1,000 rpm and 5,000 rpm for 10 s and 20 s, respectively. During the second step, 180  $\mu\text{L}$  of chlorobenzene was dripped on the spinning substrate at the 25th second of the procedure. The as-deposited perovskite intermediate film was immediately annealed on a hotplate at 100  $^{\circ}\text{C}$  for 60 min. A glass petri dish was used to cover the annealing samples in the first 2 min during the annealing process. After cooling down to room temperature, a 200 nm thick bis(trifluoromethane)sulfonimide lithium salt and tert-butylpyridine doped Spiro-OMeTAD layer was coated onto the perovskite film as hole transporting layer. Finally, a 60 nm of gold back contact electrode was deposited by thermal evaporation to finish the fabrication of the whole device.

### **1.3 Solar cell characterization**

The perovskite solar cells (PSCs) devices were stored in a dark electronic drying cabinet with relative humidity below 10%.  $J-V$  curves were measured using Keithley 2400 in a  $\text{N}_2$ -filled glovebox, and under simulated AM 1.5G conditions (Enli tech, AAA solar simulator). The light intensity was calibrated using an NREL-calibrated Si solar cell with KG-5 filter. To guarantee the accuracy of  $J-V$  curves measurements, a metal mask was placed in front of the solar cell to determine the exact active area (0.12  $\text{cm}^2$ ). Incident photon-to-electron conversion efficiency (IPCE) was measured on an IPCE system (Enli tech, QE-R666) and the integrated current density at the short circuit was compared with that extracted from  $J-V$  scans. Long-term operational stability of PSCs was tested using a measurement kit developed by Suzhou D&R Instruments Co., Ltd.,

in which a LED lamp with intensity of  $100 \text{ mW cm}^{-2}$  was used as light source, and a source meter with multi channels was controlled by a software to run maximum power point (MPP) tracking and  $J$ - $V$  tests.

#### **1.4 Additional materials characterization**

UV-vis absorption spectroscopy for Tauc plot analysis and photoluminescence spectroscopy were acquired in a  $\text{N}_2$ -filled glovebox with a flame spectrometer (Ocean Optics). XRD measurements were carried out on a D8 Advance diffractometer (Bruker AXS) with  $\text{Cu K}\alpha$  radiation source. SEM was performed using a field-emission scanning electron microscope (Hitachi S-8000). Space-charge-limited current (SCLC) was performed by measuring the dark  $I$ - $V$  curves of the simplified devices of FTO/perovskite/Au on a CHI660E potentiostat. Electrochemical impedance spectroscopy (EIS) was also performed on CHI660E. The light intensity dependence tests were measured under light illumination of the solar simulator in a  $\text{N}_2$ -filled glovebox.

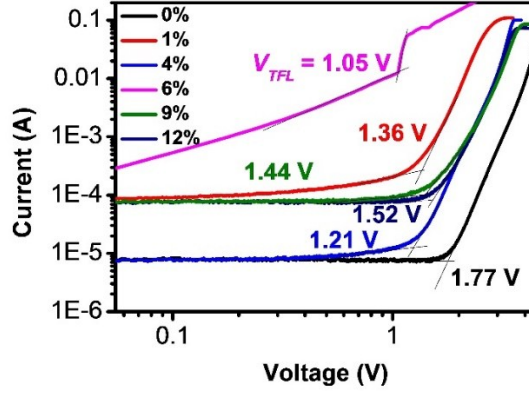

**Fig. S1** Space-charge-limited current (SCLC) measurements of perovskite films with Br ratio of 0%, 1%, 4%, 6%, 9%, and 12%.

**Table S1** Trap state density of perovskite films with different Br ratio. Note that the doping content of Cs is also varied because the used dopant is  $\text{CsPbBr}_3$  to keep the stoichiometry of perovskite. The  $V_{TFL}$  value of perovskite film with 6% Br is determined according to our previously reported work (reference 32).

| Br ratio                                 | 0%   | 1%   | 4%   | 6%   | 9%   | 12%  |
|------------------------------------------|------|------|------|------|------|------|
| $V_{TFL}$ (V)                            | 1.77 | 1.36 | 1.21 | 1.05 | 1.44 | 1.52 |
| $n_{trap}$ ( $10^{16} \text{ cm}^{-1}$ ) | 2.74 | 2.11 | 1.87 | 1.63 | 2.24 | 2.36 |

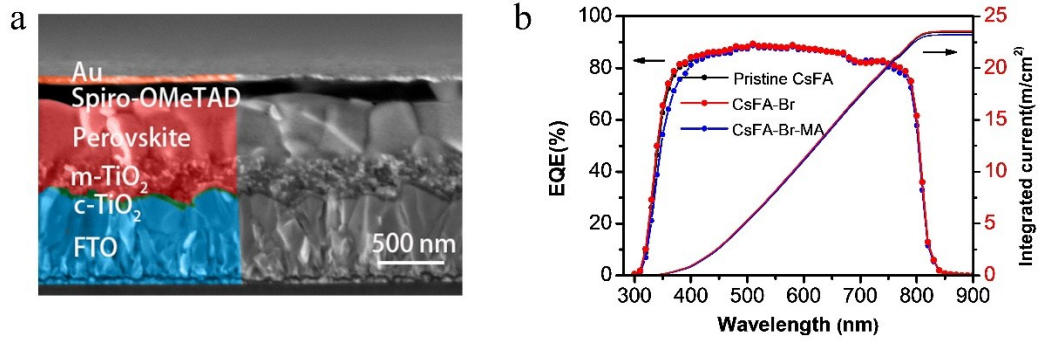

**Fig. S2** (a) Cross-sectional SEM image of a typical PSC, showing a device configuration of FTO/c-TiO<sub>2</sub>/m-TiO<sub>2</sub>/Perovskite/Spiro-OMeTAD/Au. (b) IPCE spectra of PSCs with different perovskite composition. The integrated  $J_{SC}$  for pristine CsFA, CsFA-Br, and CsFA-Br-MA is 23.46, 23.56, and 23.22 mA cm<sup>-2</sup>, respectively.

**Table S2**  $J$ – $V$  parameters of the freshly fabricated PSCs with perovskite composition of pristine CsFA, CsFA–Br, and CsFA–Br–MA.

| Perovskite    | $J_{SC}/\text{mA cm}^{-2}$ | $V_{OC}/\text{V}$ | FF    | PCE/% |
|---------------|----------------------------|-------------------|-------|-------|
| Pristine CsFA | 24.65                      | 0.998             | 0.532 | 13.08 |
| CsFA–Br       | 24.40                      | 1.043             | 0.707 | 18.00 |
| CsFA–Br–MA    | 24.39                      | 1.004             | 0.558 | 13.67 |

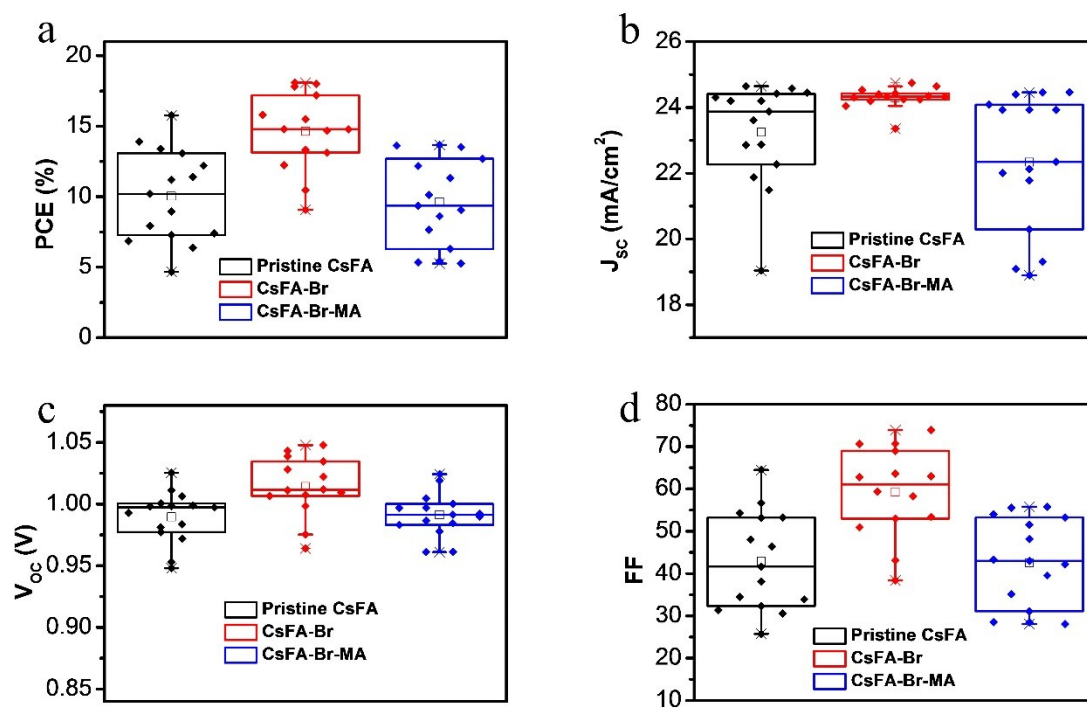

**Fig. S3** Statistical results of (a) PCE, (b)  $J_{SC}$ , (c)  $V_{OC}$ , and (d) FF from one batch of 14 freshly fabricated PSCs.

**Table S3**  $J$ – $V$  parameters of the PSCs after light soaking with perovskite composition of pristine CsFA, CsFA–Br, and CsFA–Br–MA.

| Perovskite    | $J_{SC}/\text{mA cm}^{-2}$ | $V_{OC}/\text{V}$ | FF    | PCE/% |
|---------------|----------------------------|-------------------|-------|-------|
| Pristine CsFA | 25.02                      | 1.052             | 0.765 | 20.16 |
| CsFA–Br       | 24.91                      | 1.053             | 0.776 | 20.36 |
| CsFA–Br–MA    | 24.94                      | 1.052             | 0.771 | 20.22 |

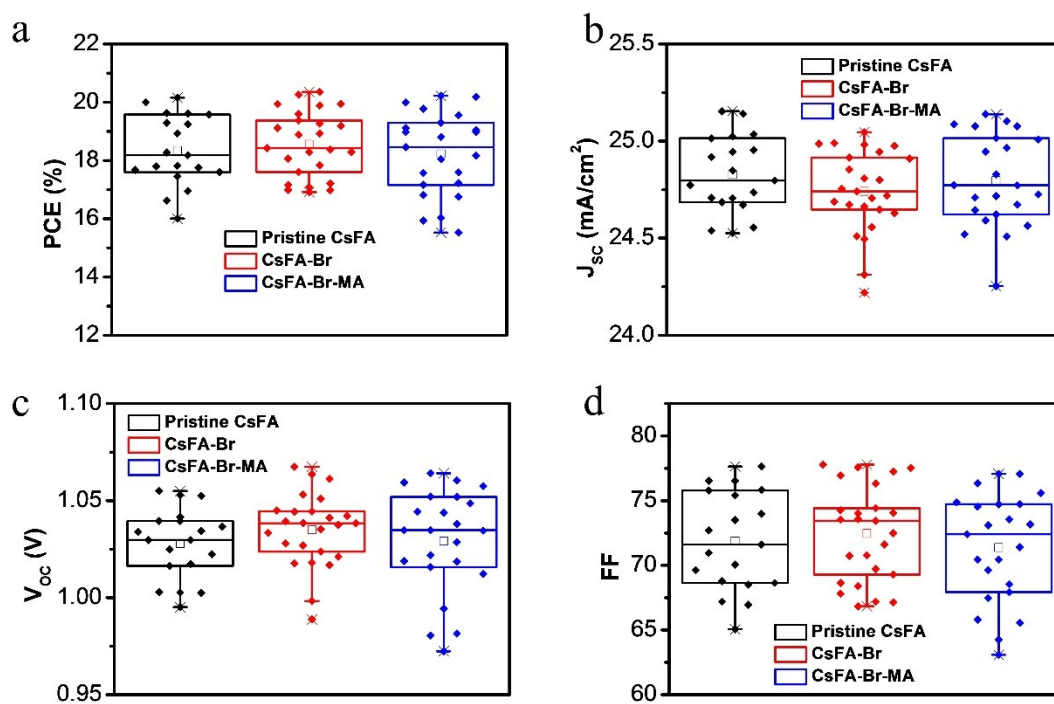

**Fig. S4** Statistical results of (a) PCE, (b)  $J_{SC}$ , (c)  $V_{OC}$ , and (d) FF from one batch of 19 PSCs of pristine CsFA, 25 PSCs of CsFA–Br, and 23 PSCs of CsFA–Br–MA after light soaking.

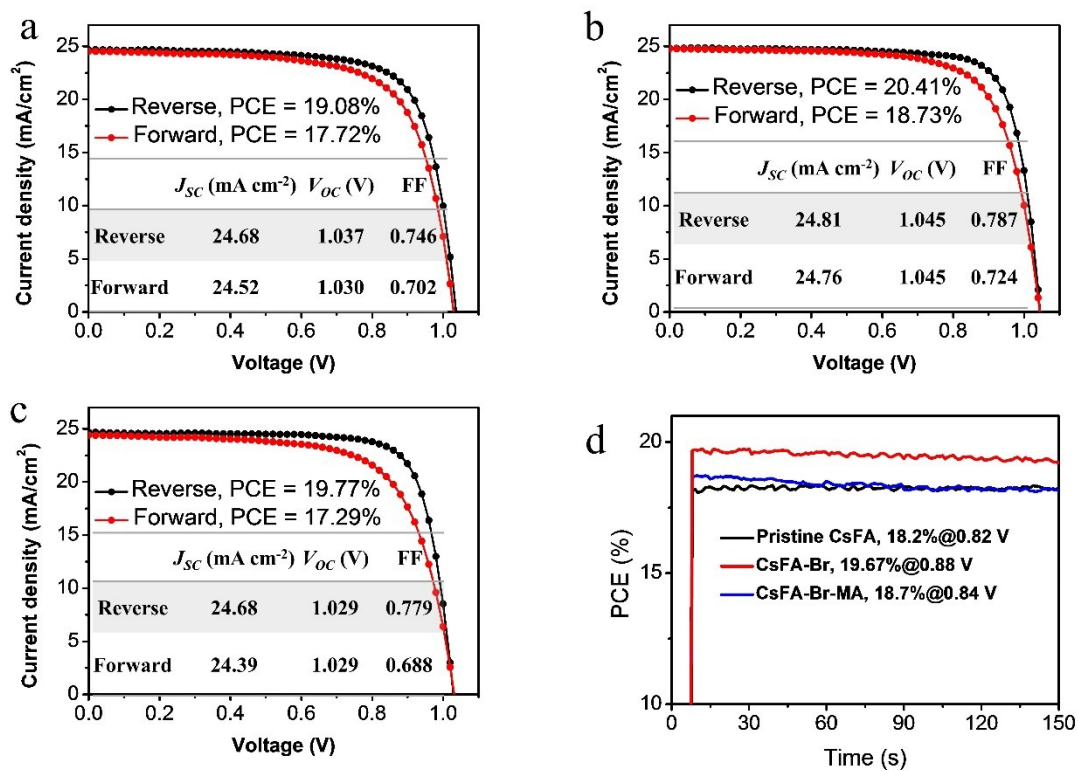

**Fig. S5** Hysteresis of PSCs with different perovskite composition.  $J$ - $V$  curves of PSCs measured by both reverse (from 1.2 to -0.2 V) and forward scan direction of the devices: (a) Pristine CsFA, (b) CsFA-Br, and (c) CsFA-Br-MA. (d) Steady-state output of PSCs for pristine CsFA, CsFA-Br, and CsFA-Br-MA.



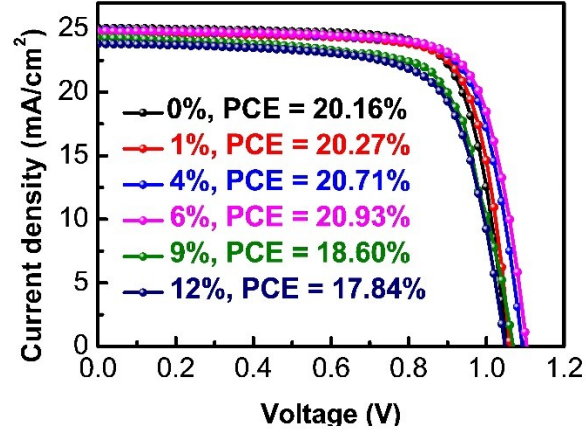

**Fig. S6**  $J$ – $V$  curves of PSCs fabricated with different doping content of Br. Note that the doping content of Cs is also varied because the used dopant is CsPbBr<sub>3</sub> to keep the stoichiometry of perovskite.

**Table S4**  $J$ – $V$  parameters of the PSCs fabricated with different doping content of Br. Note that the doping content of Cs is also varied because the used dopant is CsPbBr<sub>3</sub> to keep the stoichiometry of perovskite.

|     | $J_{SC} / \text{mA cm}^2$ | $V_{OC} / \text{V}$ | FF    | PCE /% |
|-----|---------------------------|---------------------|-------|--------|
| 0%  | 25.02                     | 1.052               | 0.765 | 20.16  |
| 1%  | 24.72                     | 1.061               | 0.772 | 20.27  |
| 4%  | 24.83                     | 1.092               | 0.763 | 20.71  |
| 6%  | 24.82                     | 1.104               | 0.764 | 20.93  |
| 9%  | 24.33                     | 1.069               | 0.715 | 18.60  |
| 12% | 23.79                     | 1.048               | 0.714 | 17.84  |

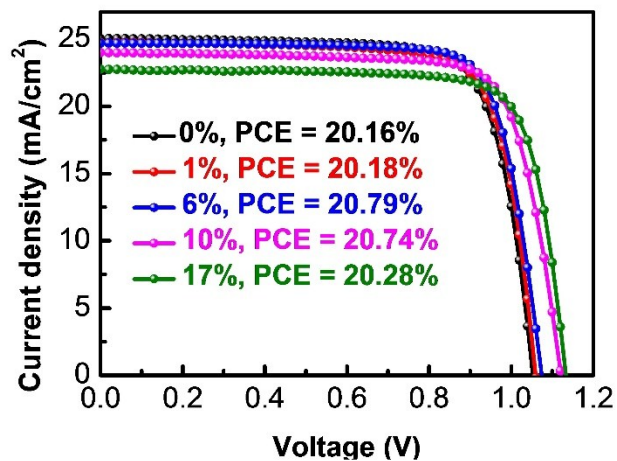

**Fig. S7**  $J$ - $V$  curves of PSCs fabricated with different doping content of MA and Br. The used dopant is  $\text{MAPbBr}_3$  to keep the stoichiometry of perovskite.

**Table S5**  $J$ - $V$  parameters of the PSCs fabricated with different doping content of MA and Br. The used dopant is  $\text{MAPbBr}_3$  to keep the stoichiometry of perovskite.

|     | $J_{\text{SC}} / \text{mA cm}^2$ | $V_{\text{OC}} / \text{V}$ | FF    | PCE / % |
|-----|----------------------------------|----------------------------|-------|---------|
| 0%  | 25.02                            | 1.052                      | 0.765 | 20.16   |
| 1%  | 24.72                            | 1.059                      | 0.771 | 20.18   |
| 6%  | 24.68                            | 1.074                      | 0.784 | 20.79   |
| 10% | 23.98                            | 1.121                      | 0.771 | 20.74   |
| 17% | 22.74                            | 1.133                      | 0.787 | 20.28   |

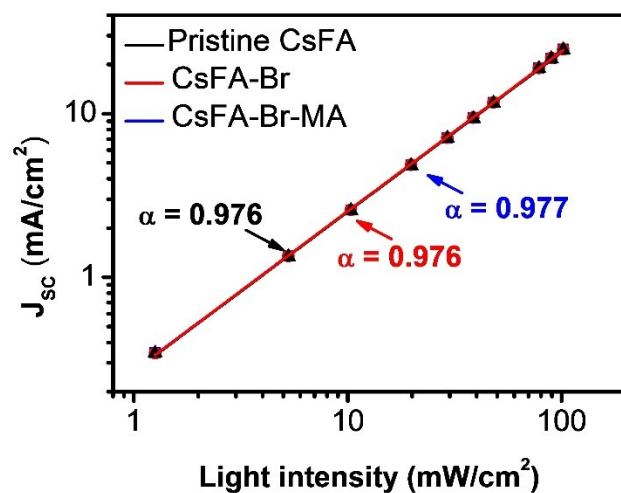

**Fig. S8** Light intensity dependence of  $J_{sc}$  for pristine CsFA, CsFA-Br, and CsFA-Br-MA PSCs.

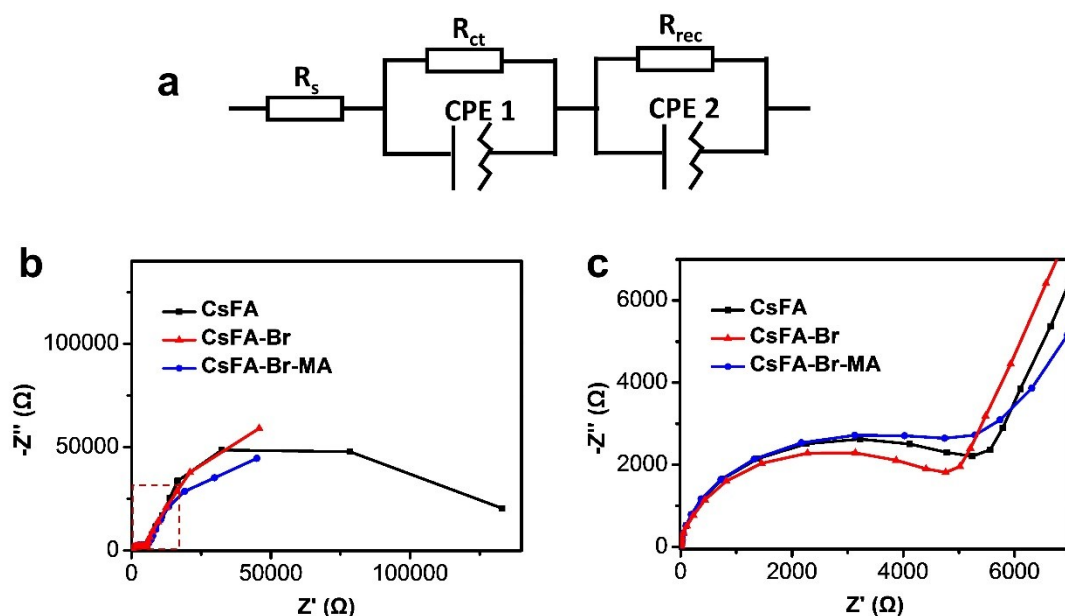

**Fig. S9** Electrochemical impedance spectroscopy (EIS) study of PSCs of CsFA, CsFA-Br and CsFA-Br-MA. (a) Equivalent circuit of PSCs. (b) EIS spectra of PSCs measured at short circuit and under 0.01 sun illumination. (c) Inset of the high-frequency region of b.
